# Supplementary material for: Microwave-assisted palladium mediated decarbonylation reaction: synthesis of eulatachromene
Source: Royal Society of Chemistry journal article supplement (doi:10.1039/c2gc35622h), 2012-01-01

## Supporting Information for Publication

### Microwave-Assisted Palladium Mediated Decarbonylation Reaction: Synthesis of Eulatachromene

Akanksha and Debabrata Maiti\*

Department of Chemistry, Indian Institute of Technology Bombay,

Powai, Mumbai 400076, India

E-mail: [dmaiti@chem.iitb.ac.in](mailto:dmaiti@chem.iitb.ac.in)

#### Table of Contents

|                               |      |
|-------------------------------|------|
| NMR spectra of compounds..... | 2-20 |
|-------------------------------|------|

Anthracene (Scheme 2, entry 1)

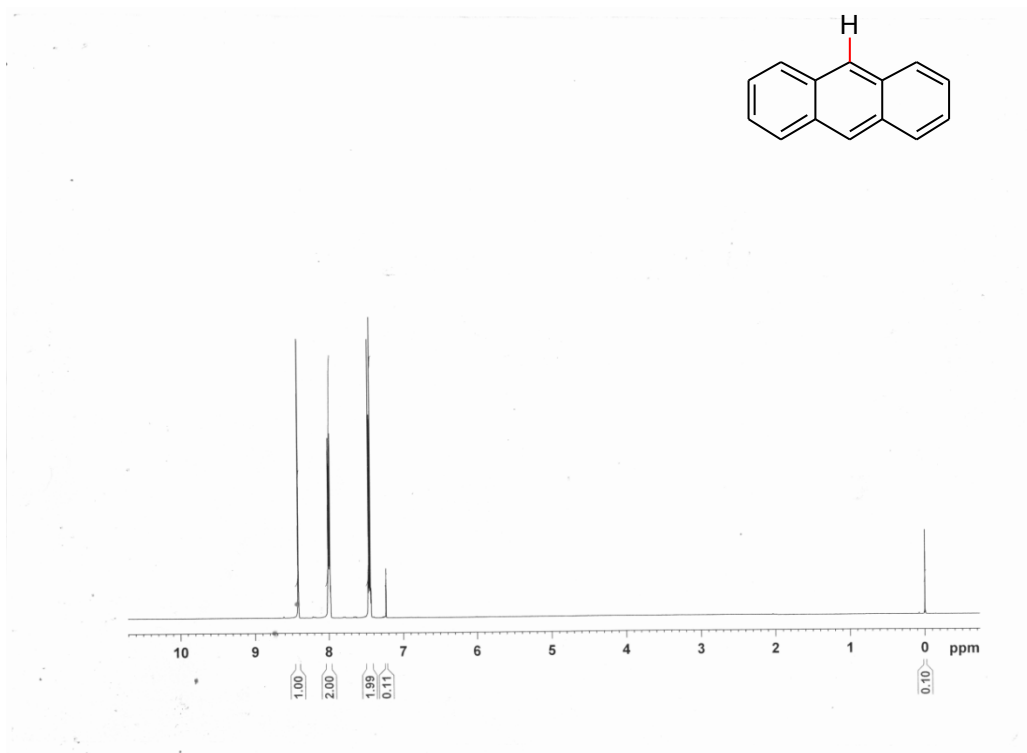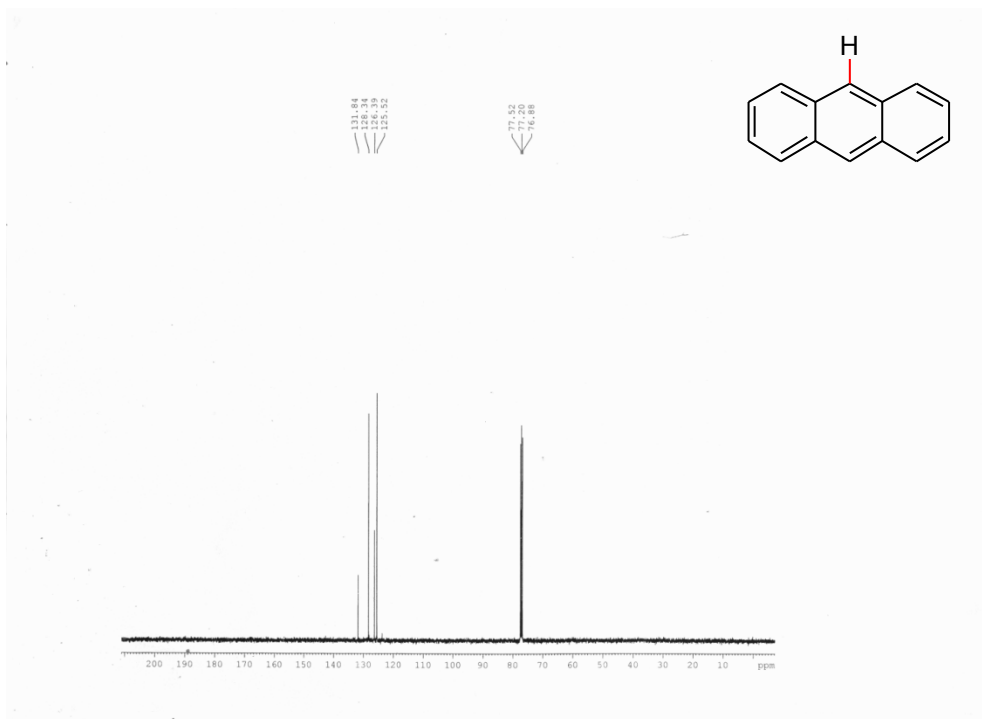

### Pyrene (Scheme 2, entry 2)

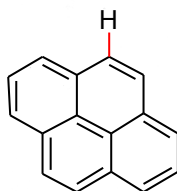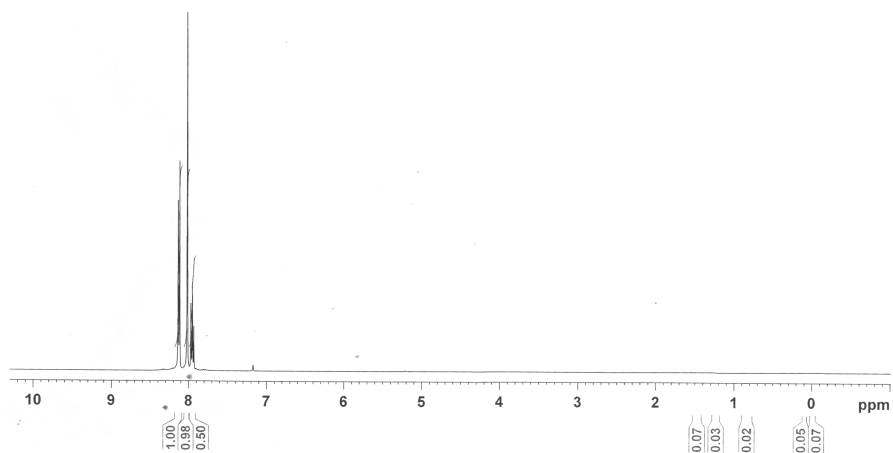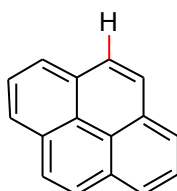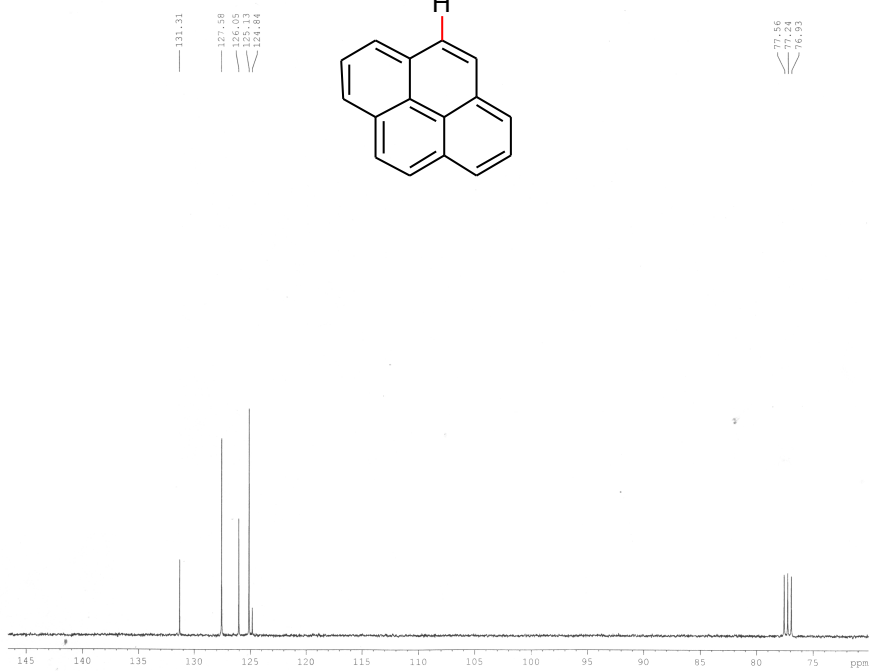

### 1,2,3-Trimethoxybenzene (Scheme 2, entry 3)

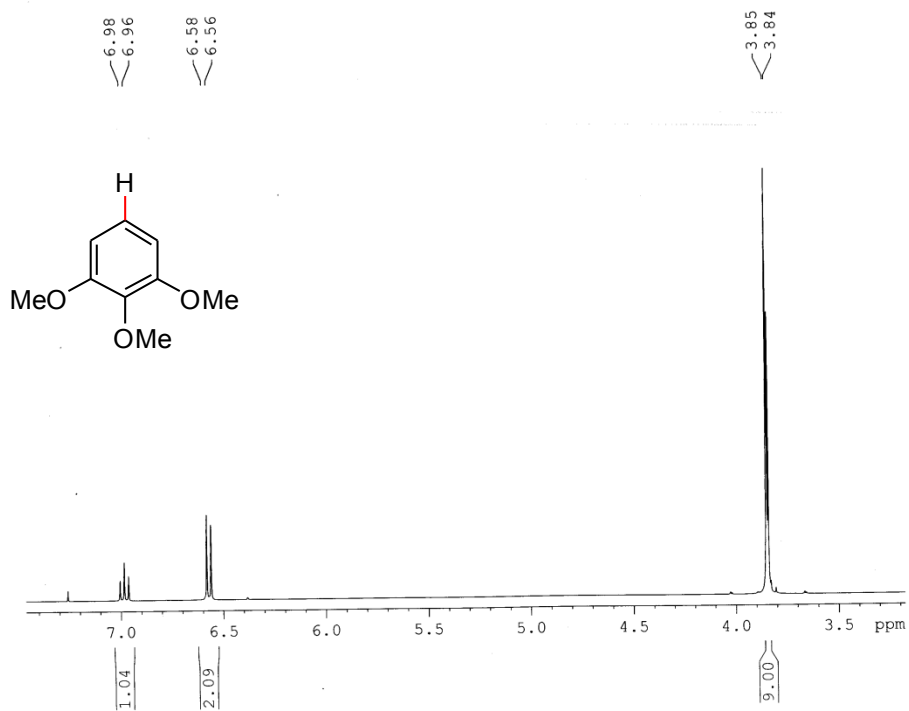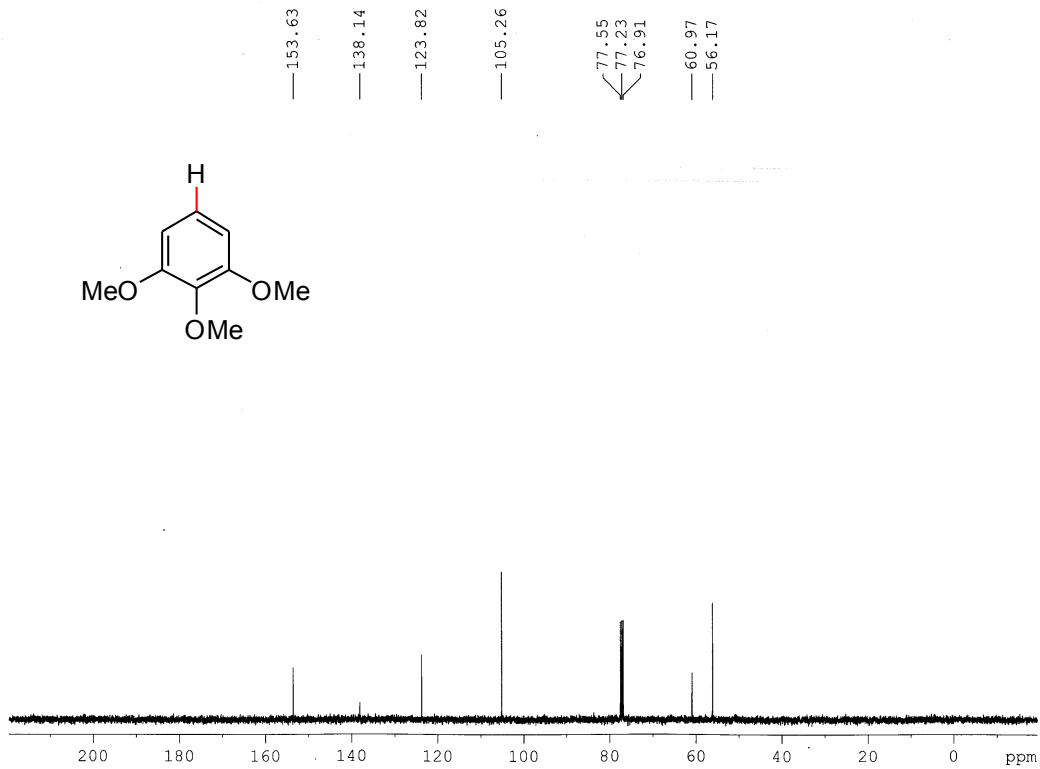

Benzoic acid (Scheme 2, entry 6)

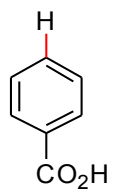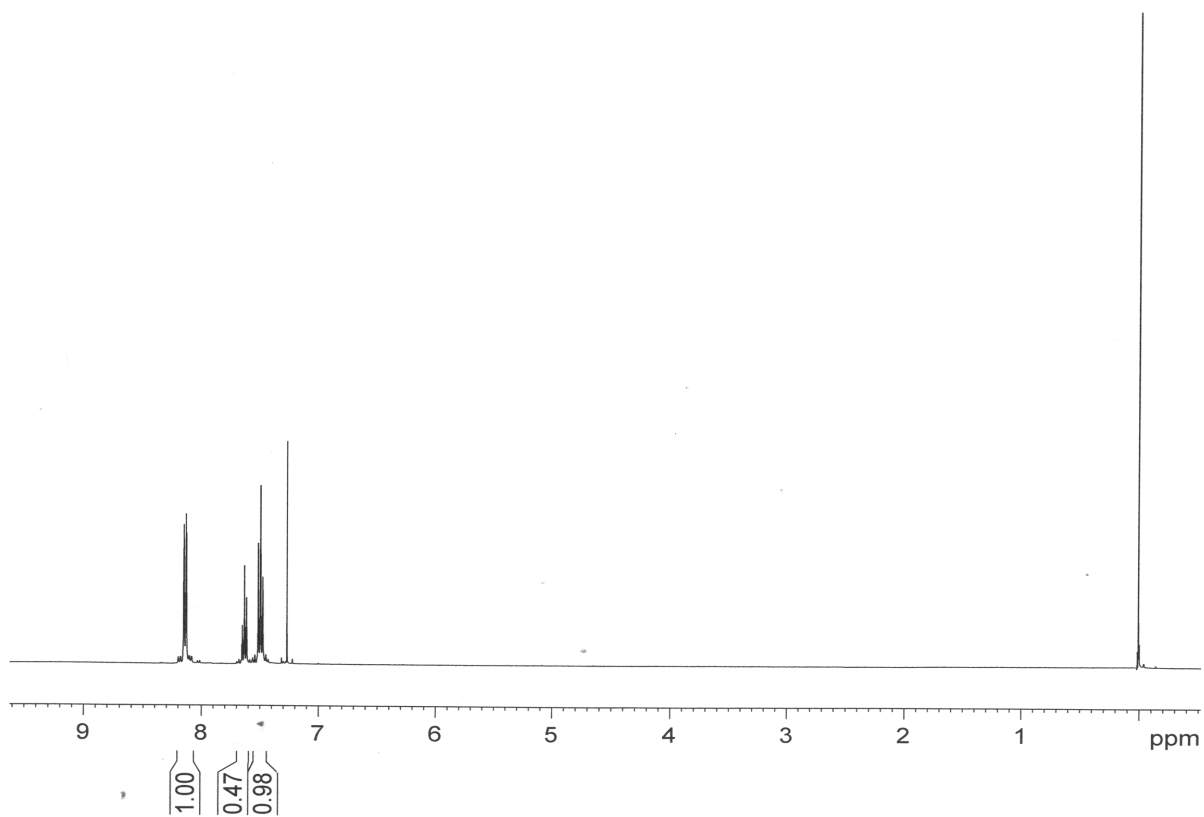

Methyl benzoate (Scheme 2, entry 7)

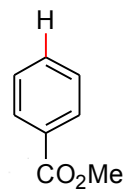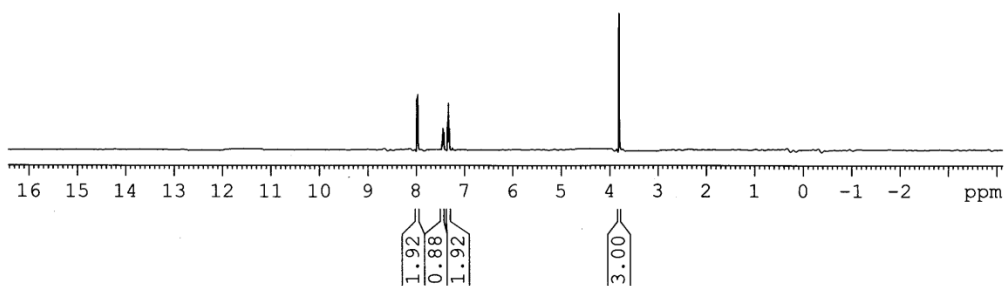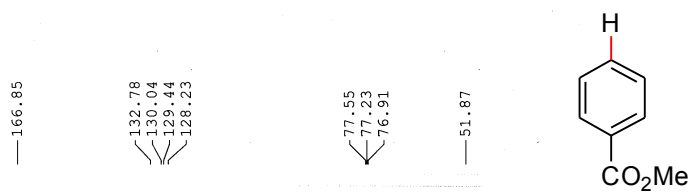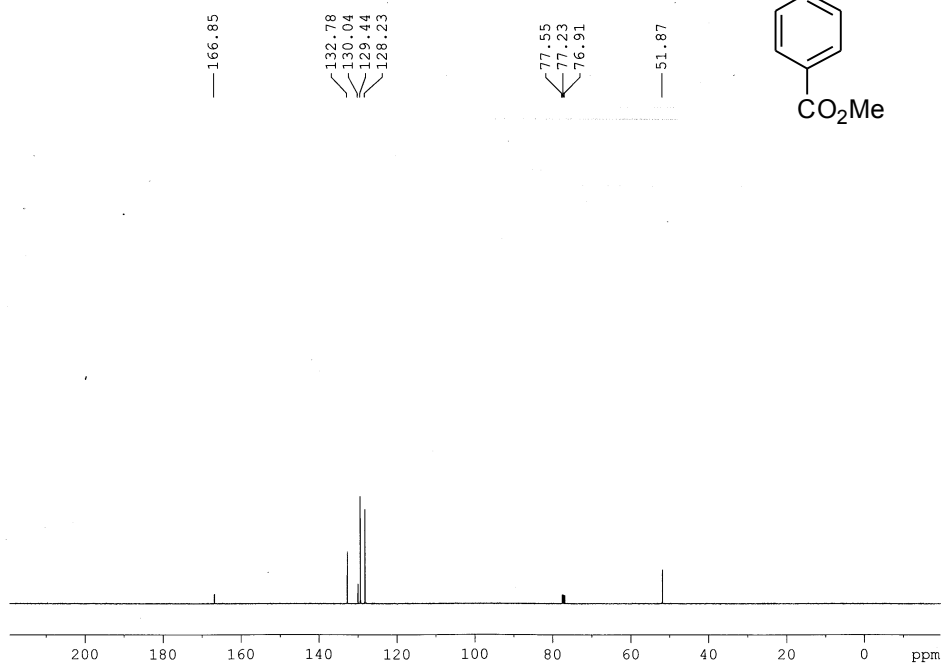

Acetophenone (Scheme 2, entry 8)

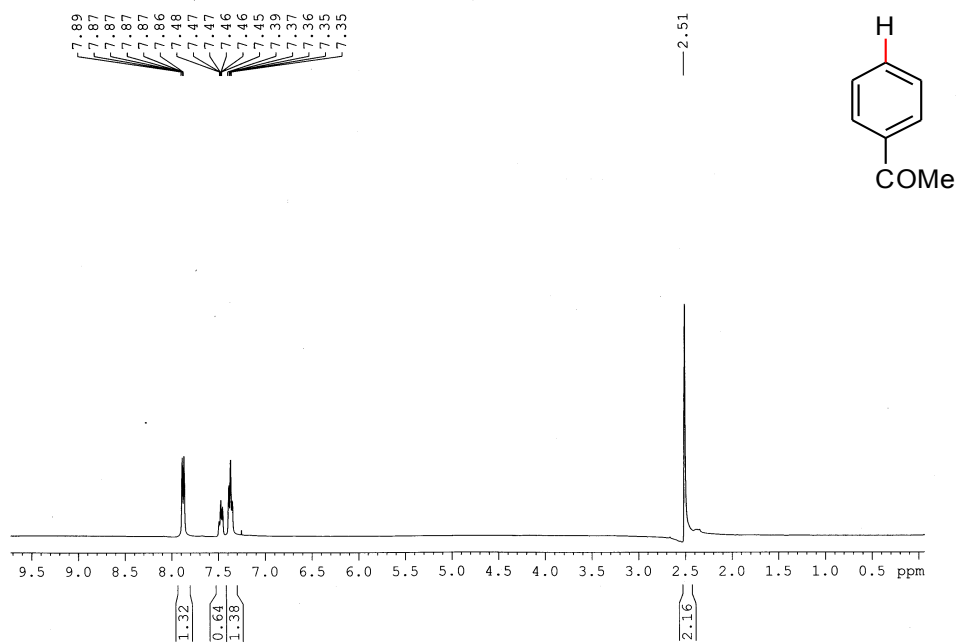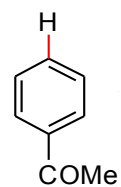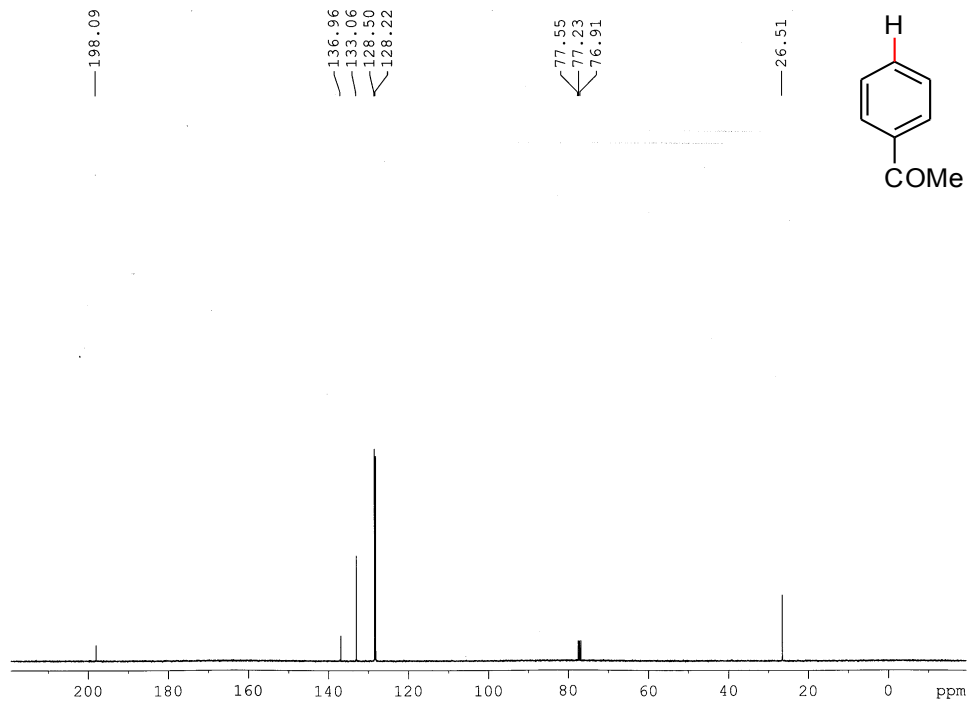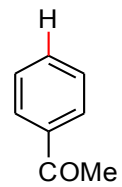

### Quinoline (Scheme 2, entry 13)

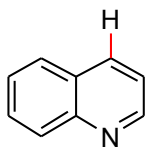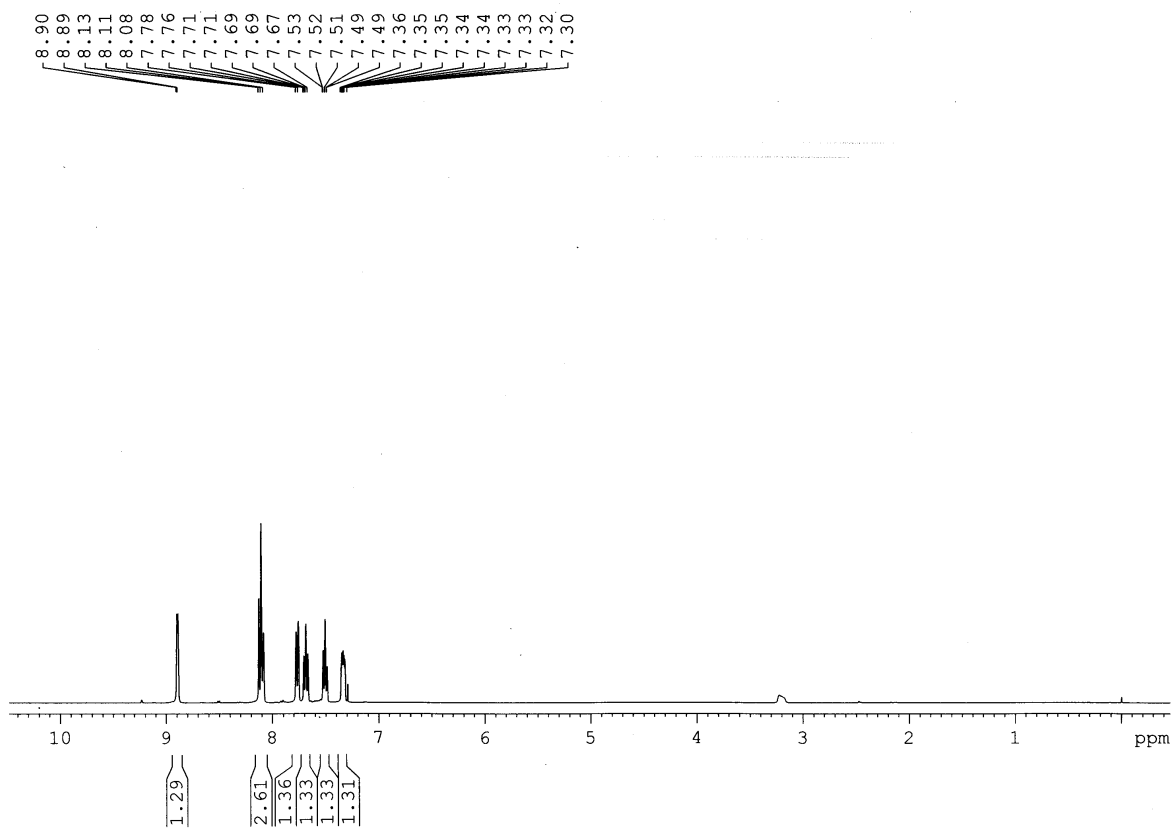



2,2-Dimethyl-2H-chromene (Scheme 2, entry 14)

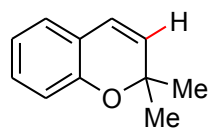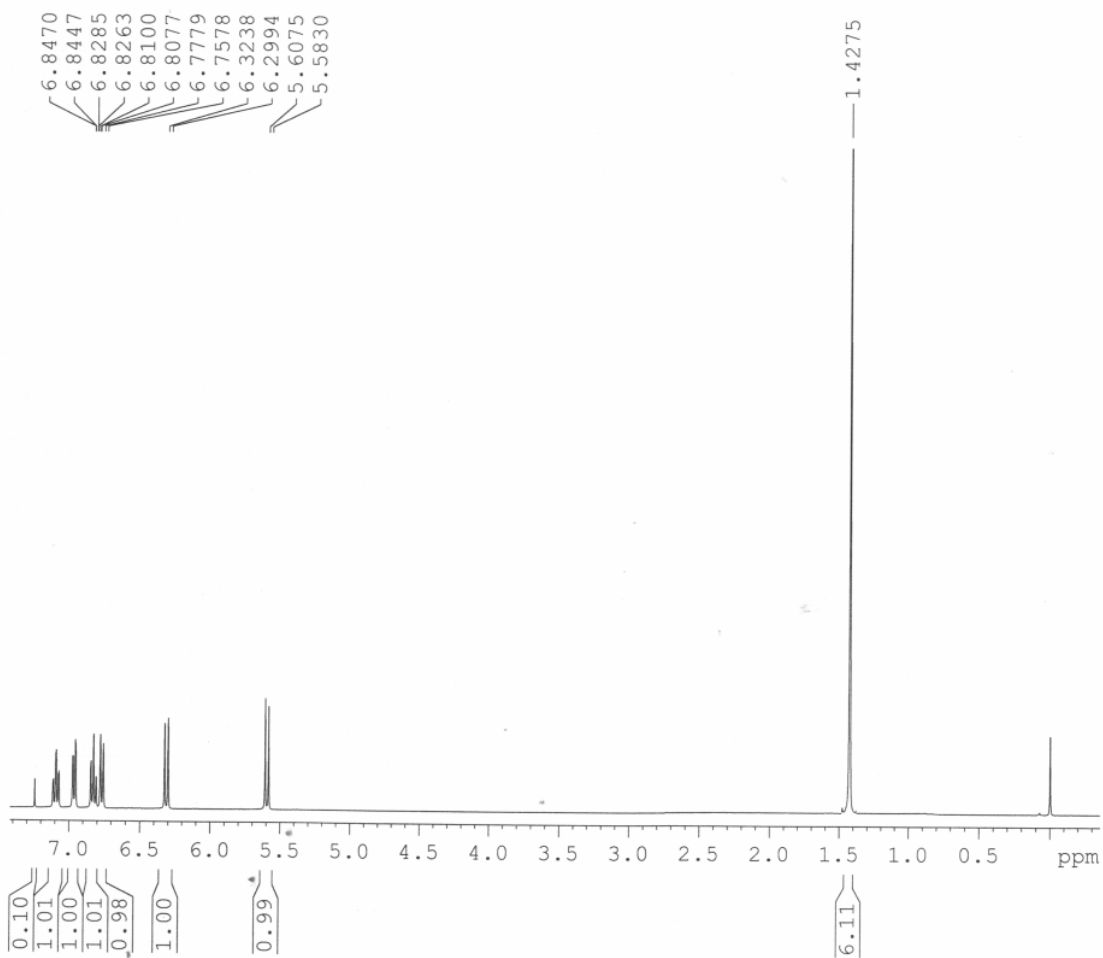

Dibenzo[b,d]furan (Scheme 2, entry 16)

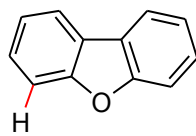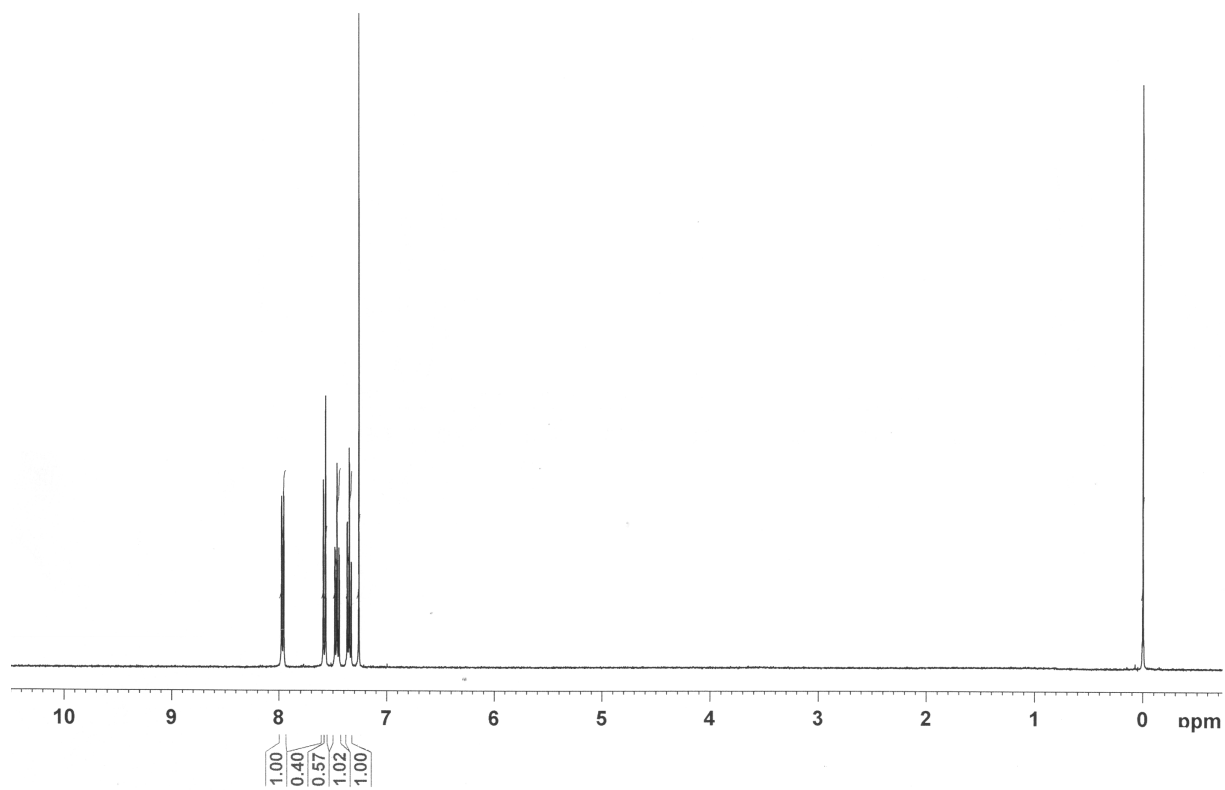

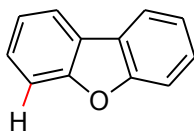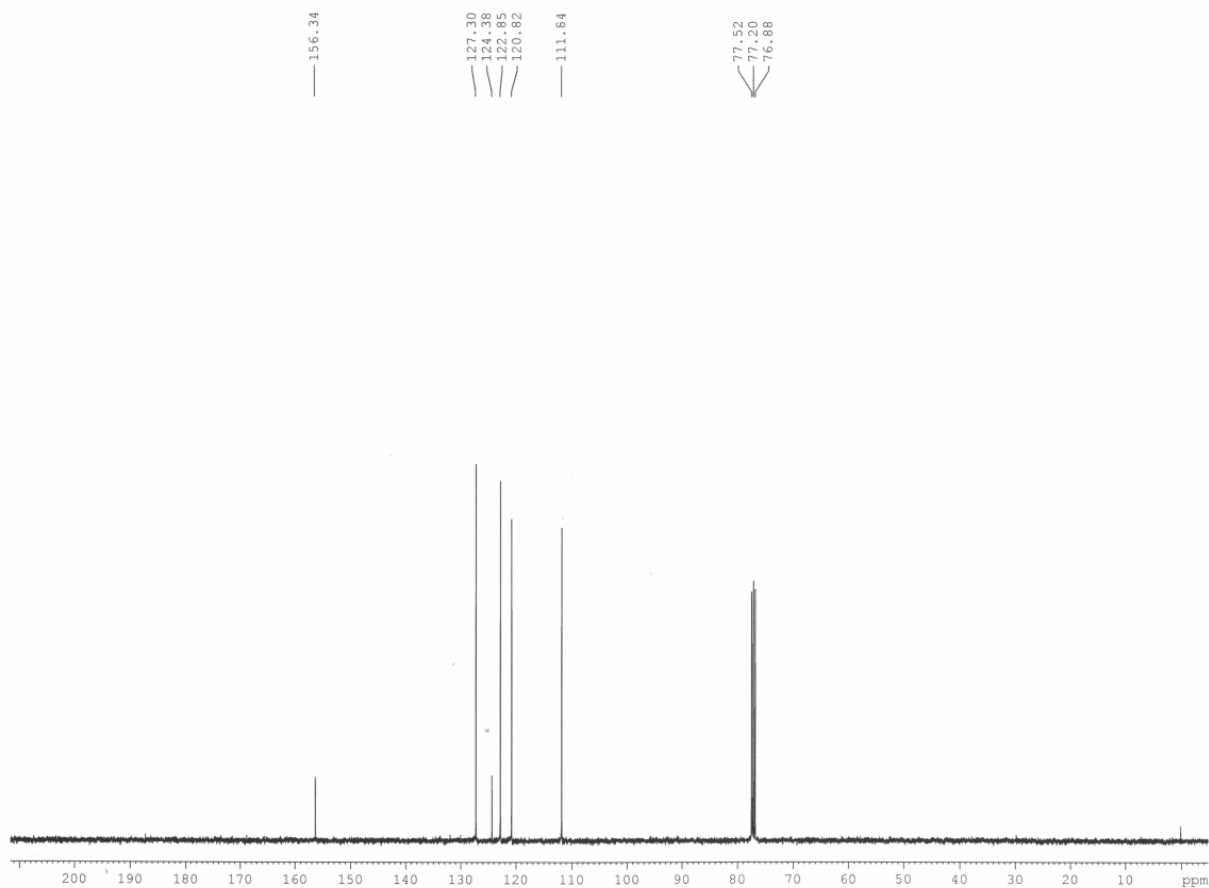

### 5-Methoxy-1H-indole (Scheme 2, entry 17)

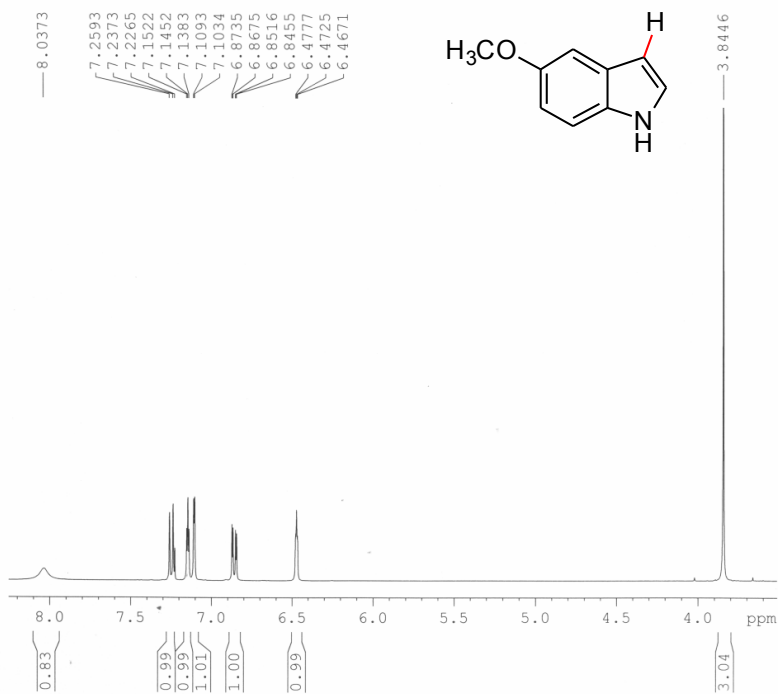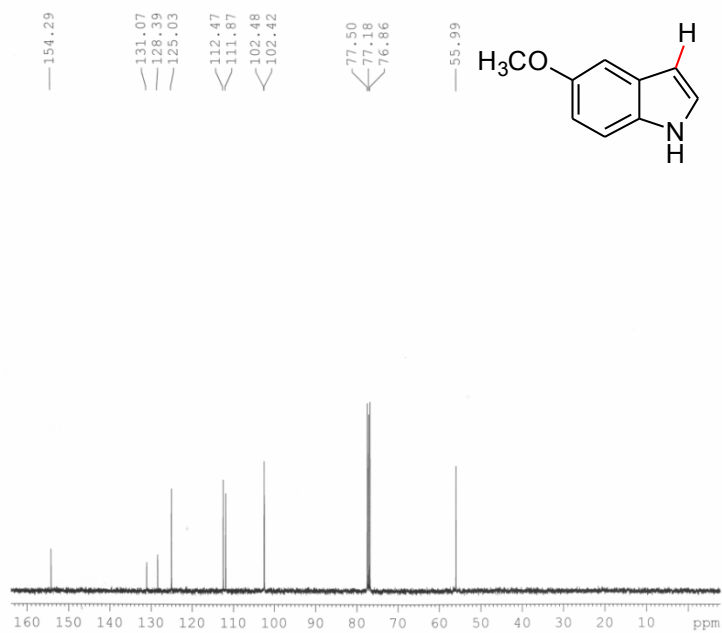

1H-Indole (Scheme 2, entry 18)

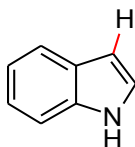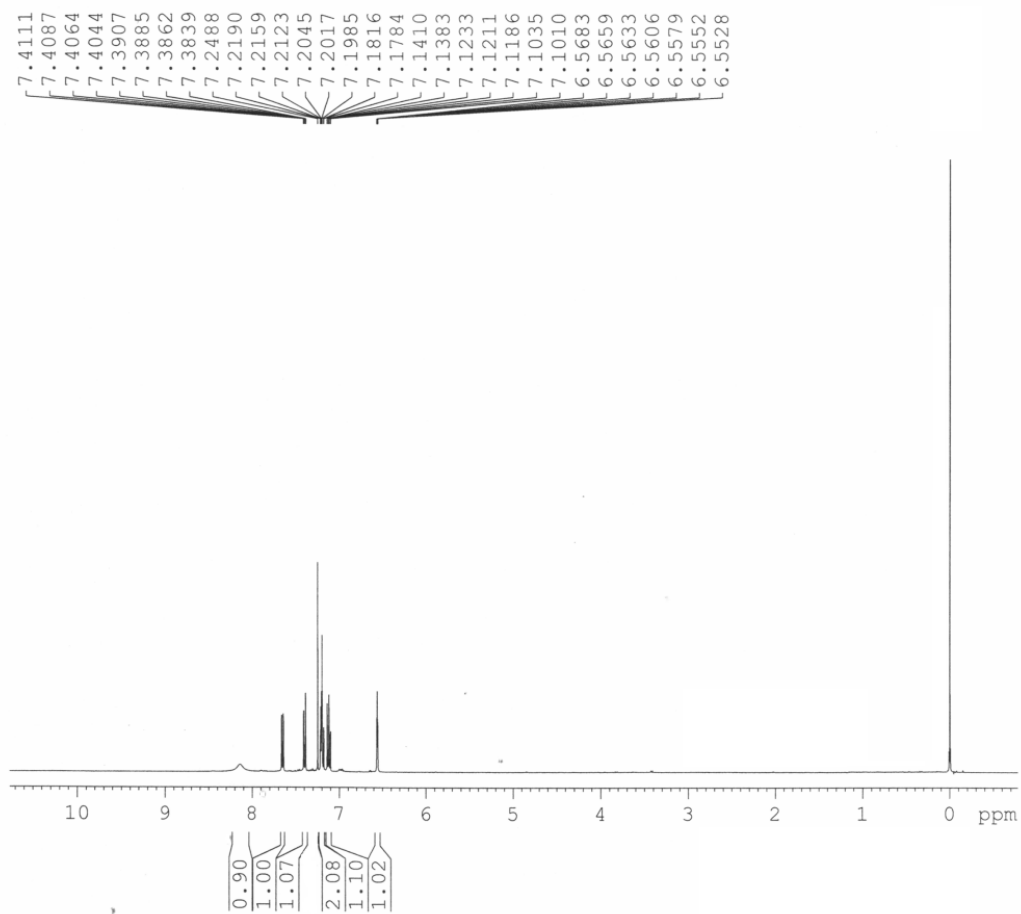

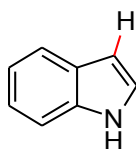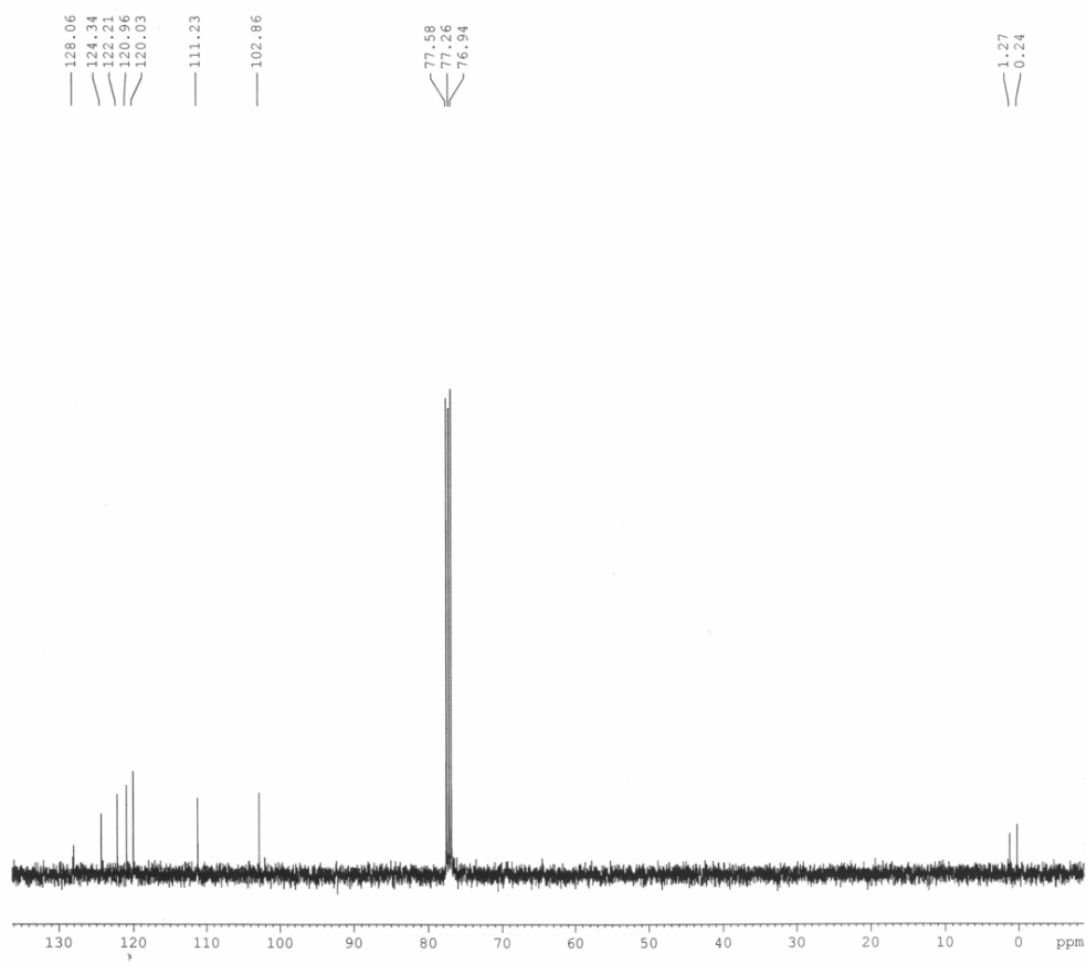

1-*p*-Tolyl-1H-indazole (Scheme 2, entry **21**)

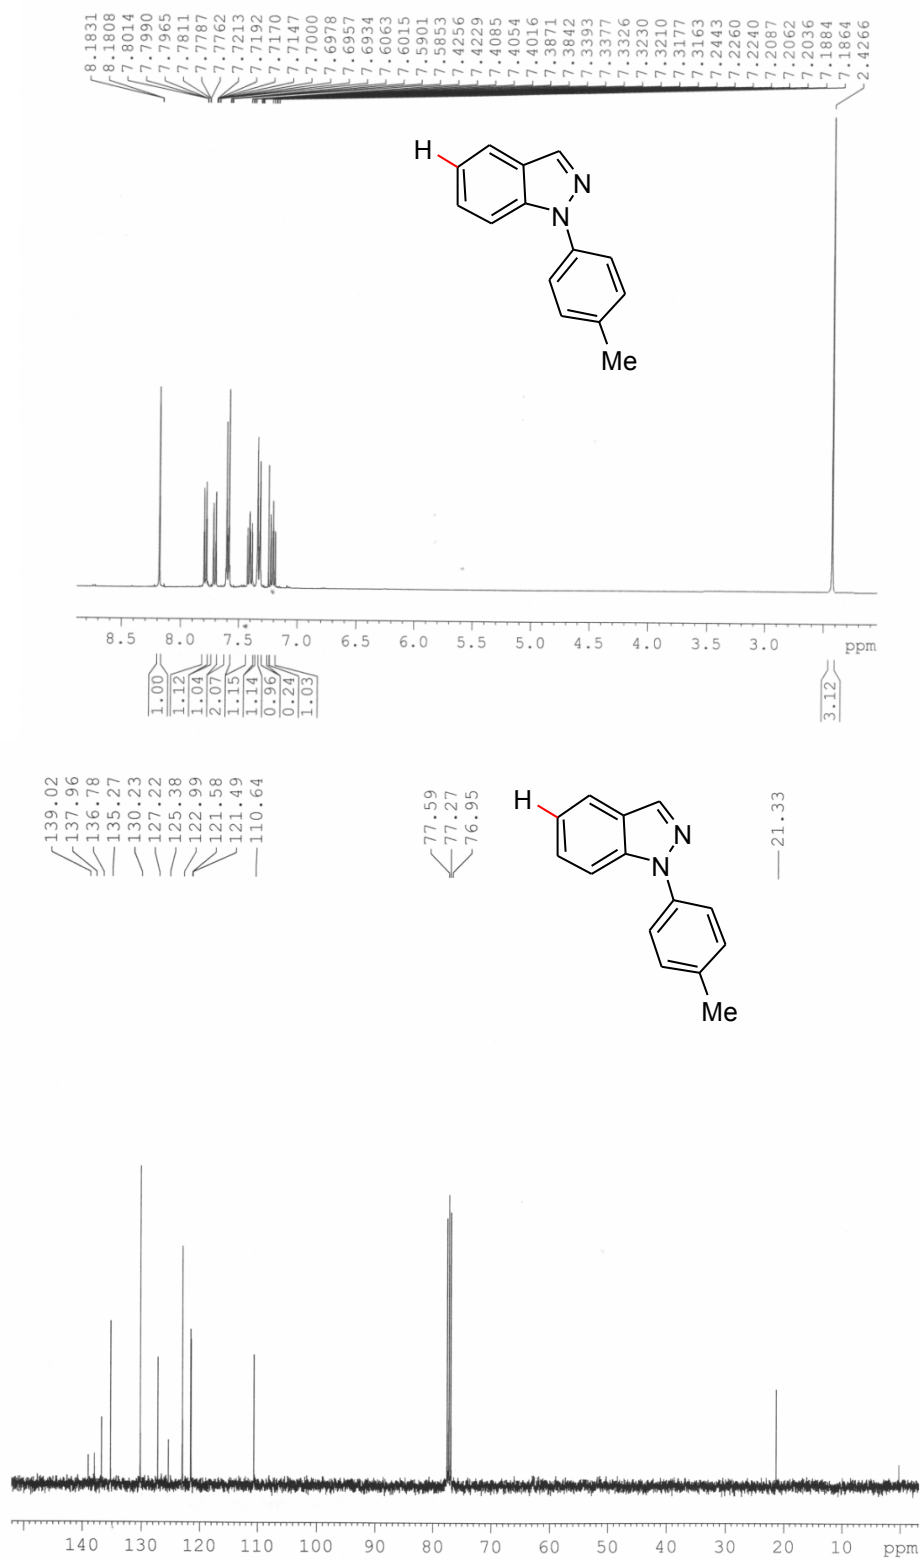

1-*p*-Tolyl-1H-pyrrolo[2,3-*b*]pyridinepyrazole (Scheme 2, entry 22)

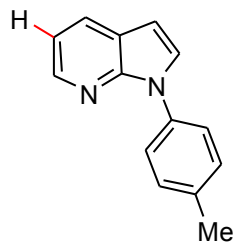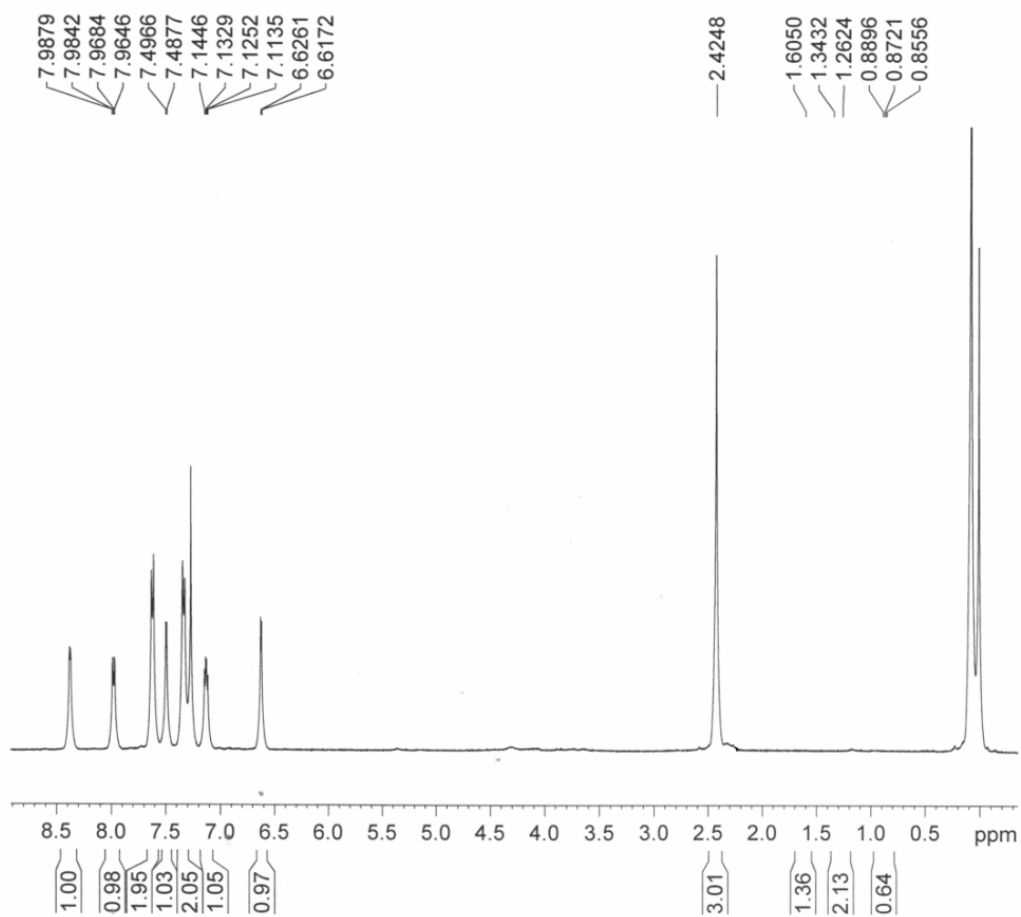



3-Methyl-1-phenyl-1H-pyrazole (Scheme 2, entry 23)

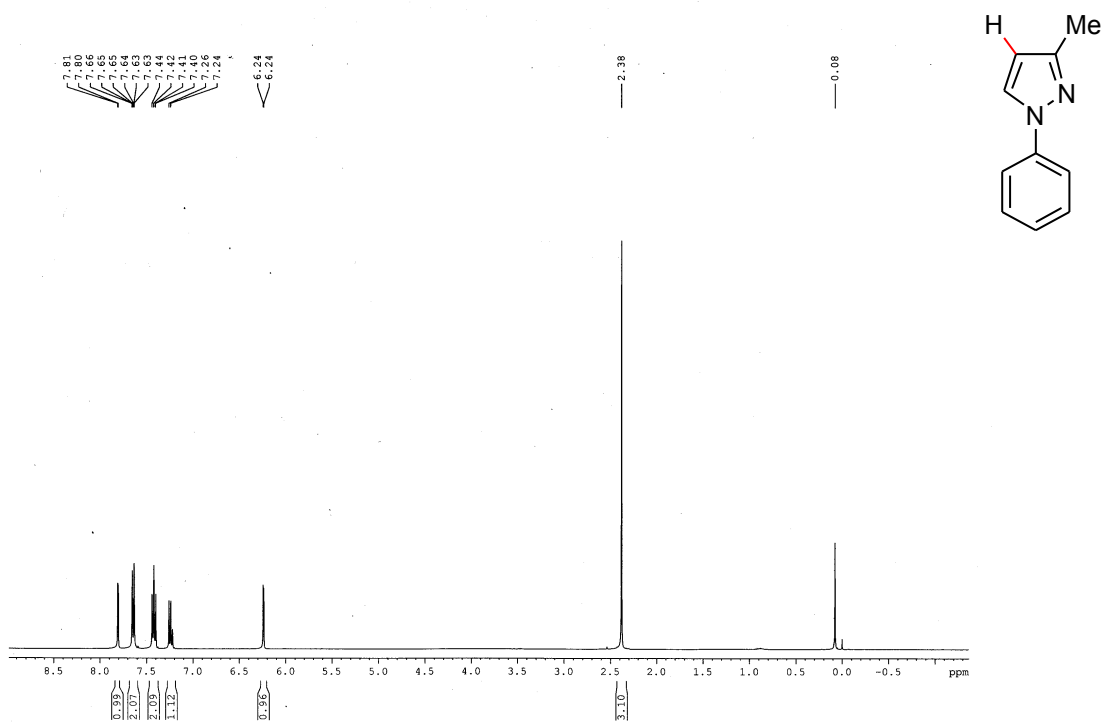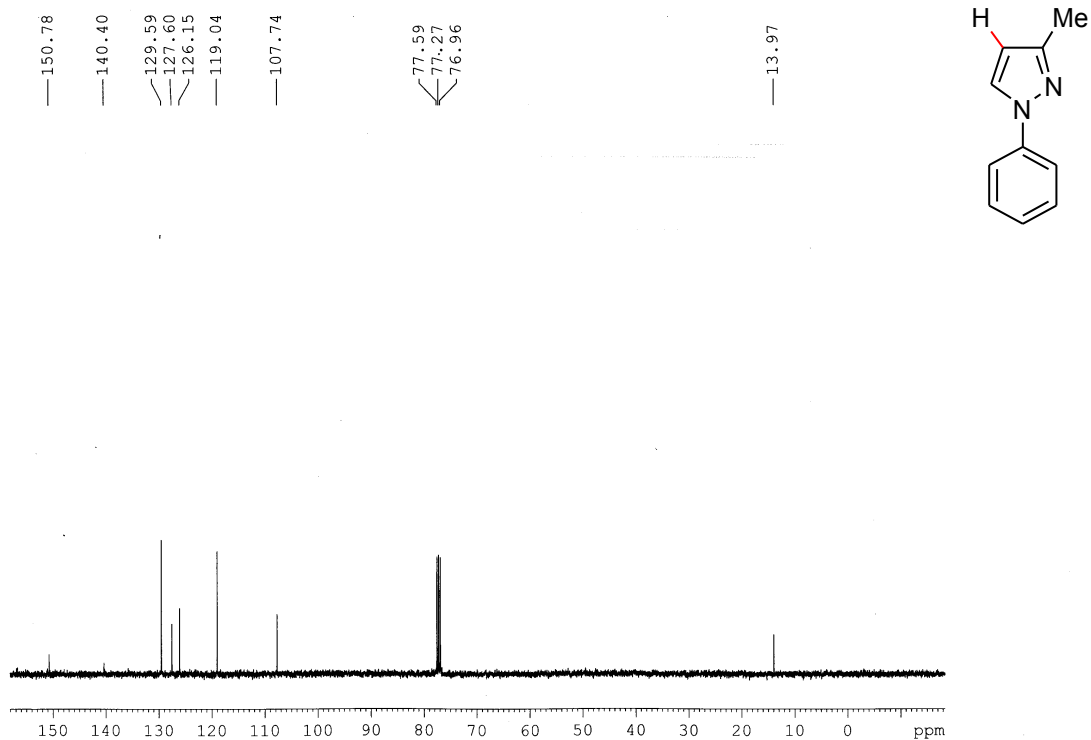

3-Formyl-2,2-dimethyl-2H-chromene-6-carboxylate (Scheme 4)

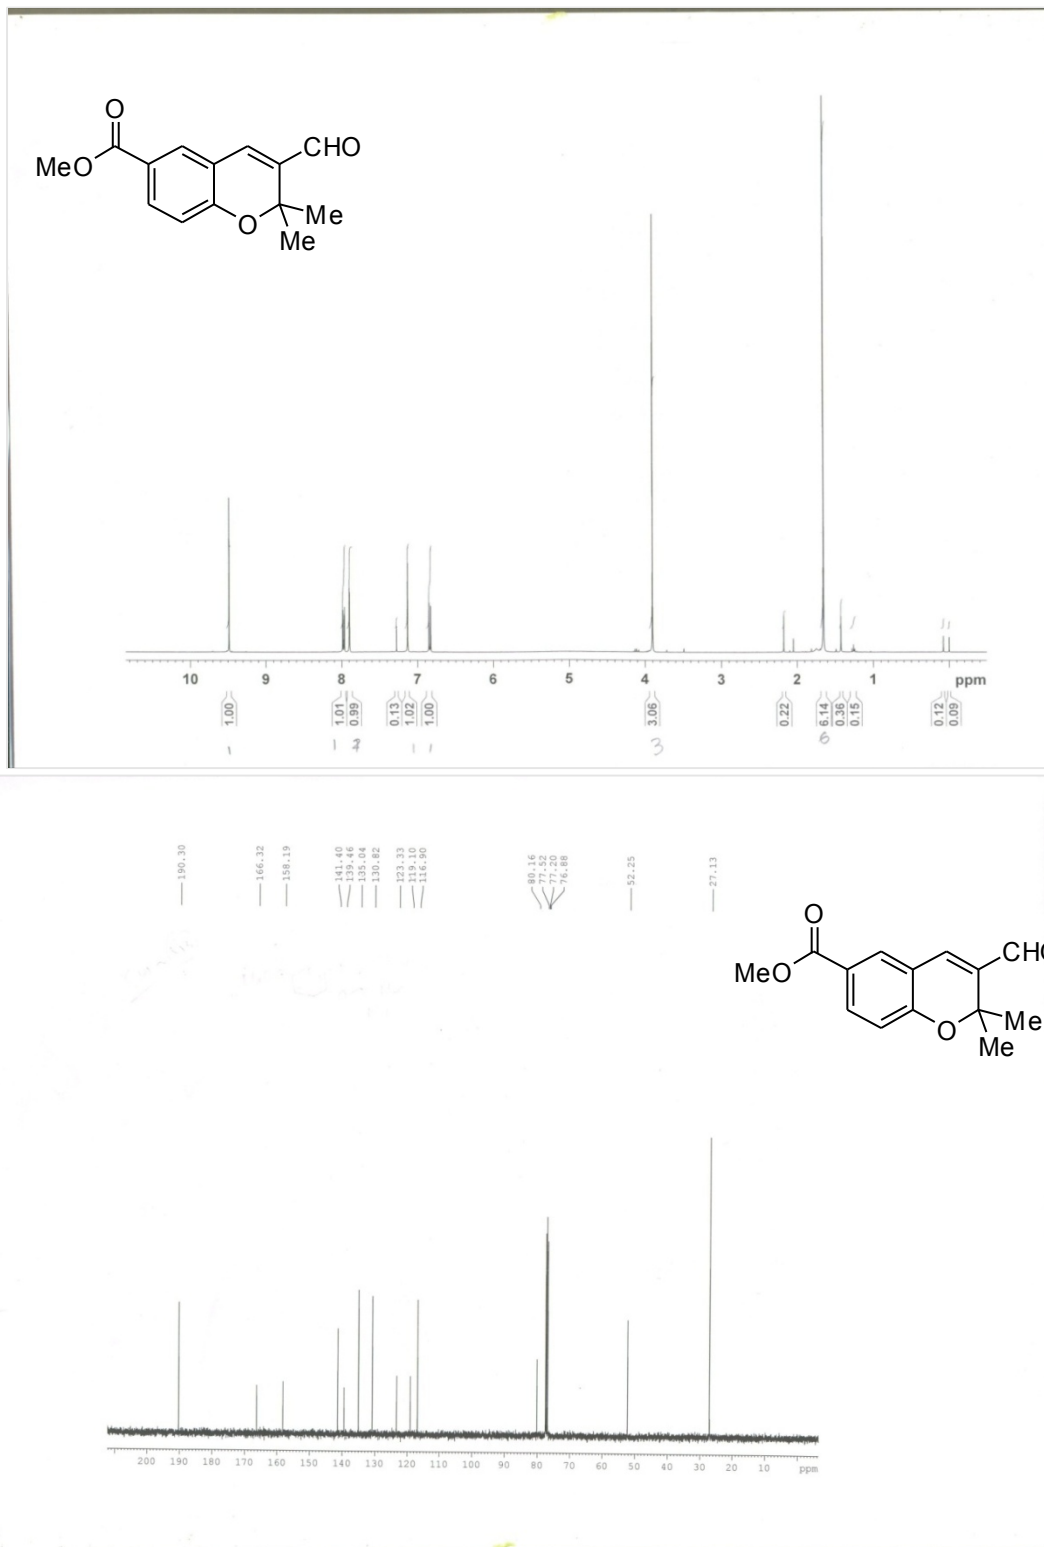

2,2-Dimethyl-2H-chromene-6-carboxylate (Scheme 4)

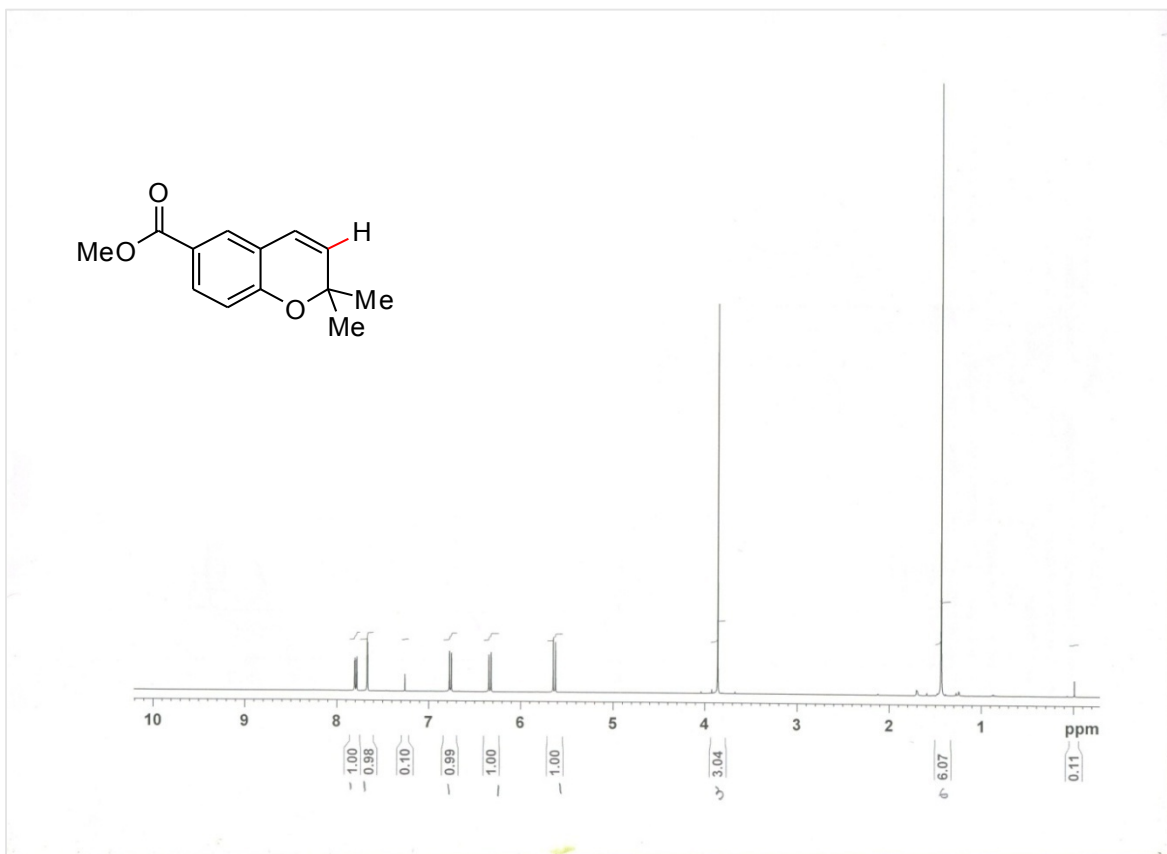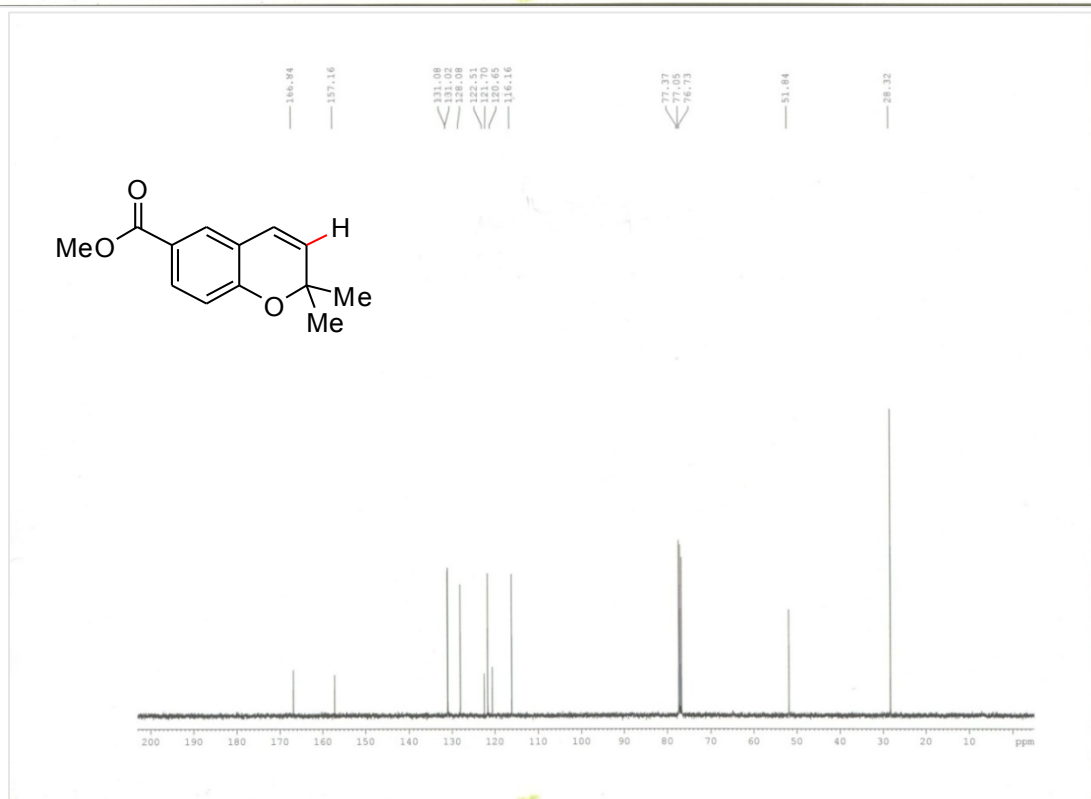

(2,2-Dimethyl-2*H*-chromen-6-yl)methanol (Scheme 4)

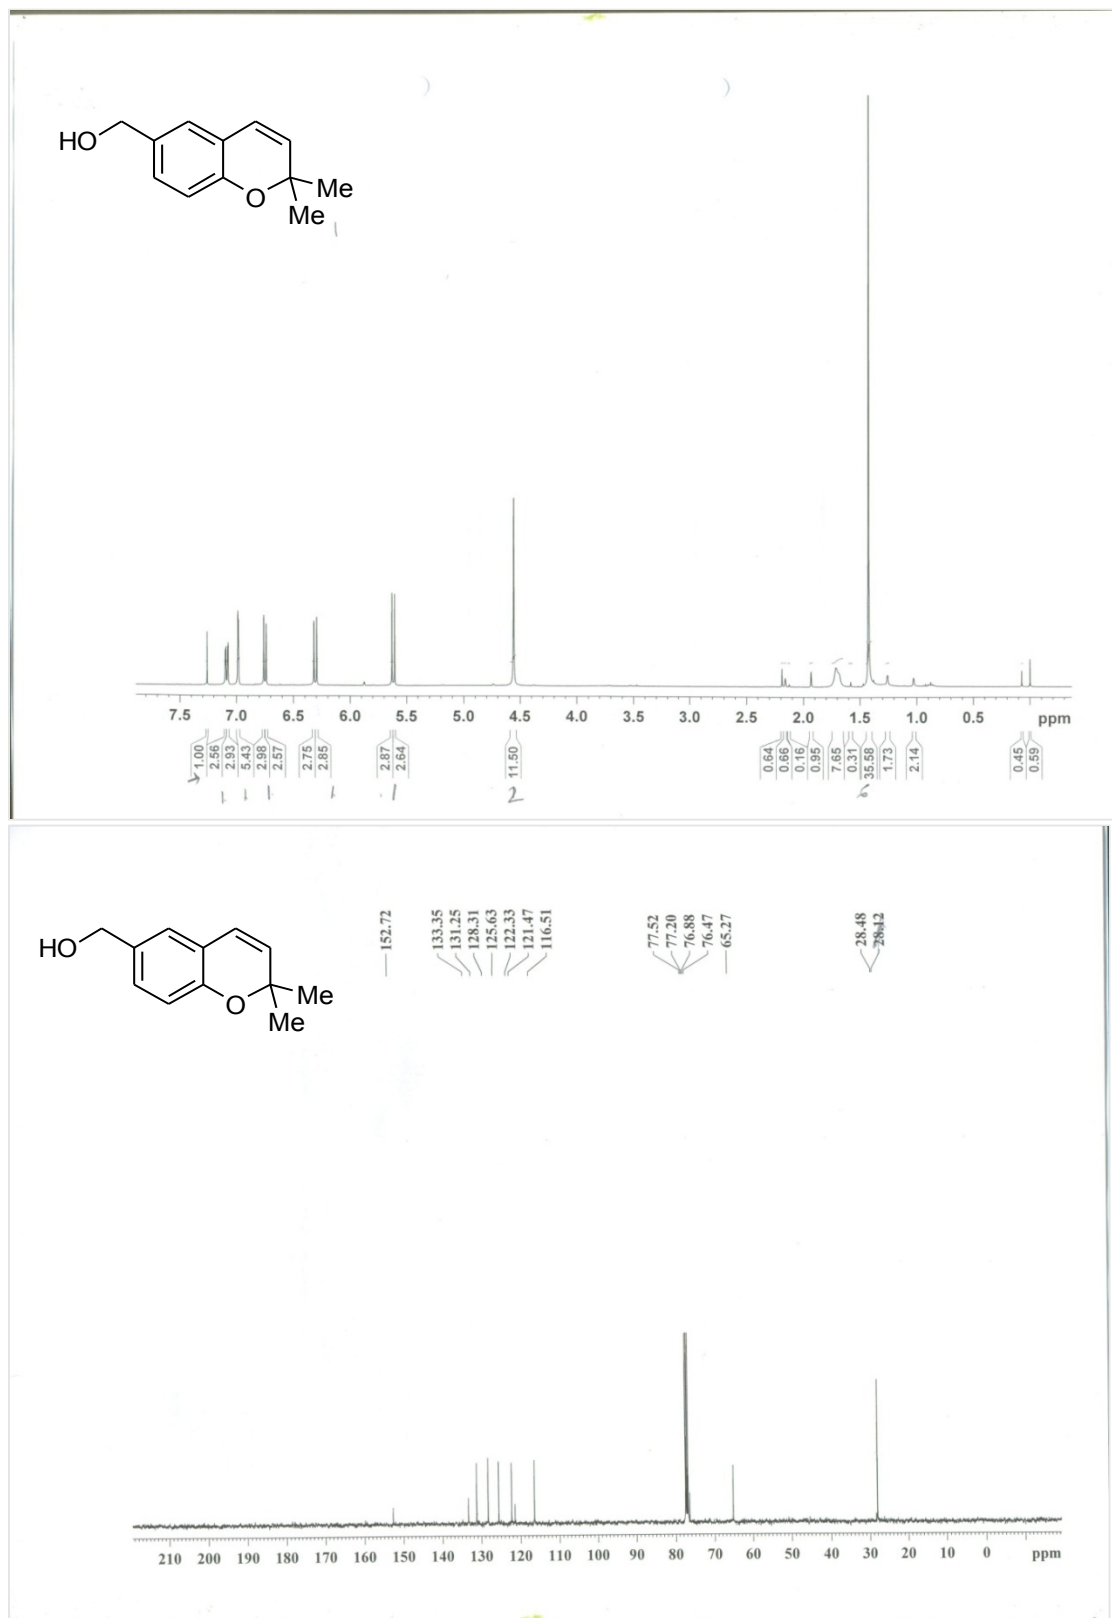

Supplement: c2gc35622h.pdf [file c2gc35622h.pdf]
